# Supplementary material
Source: Springer Nature journal article supplement (https://www.springermedizin.de/resource/supplementary/12933_2011_420_MOESM4_ESM.pdf/9538146)

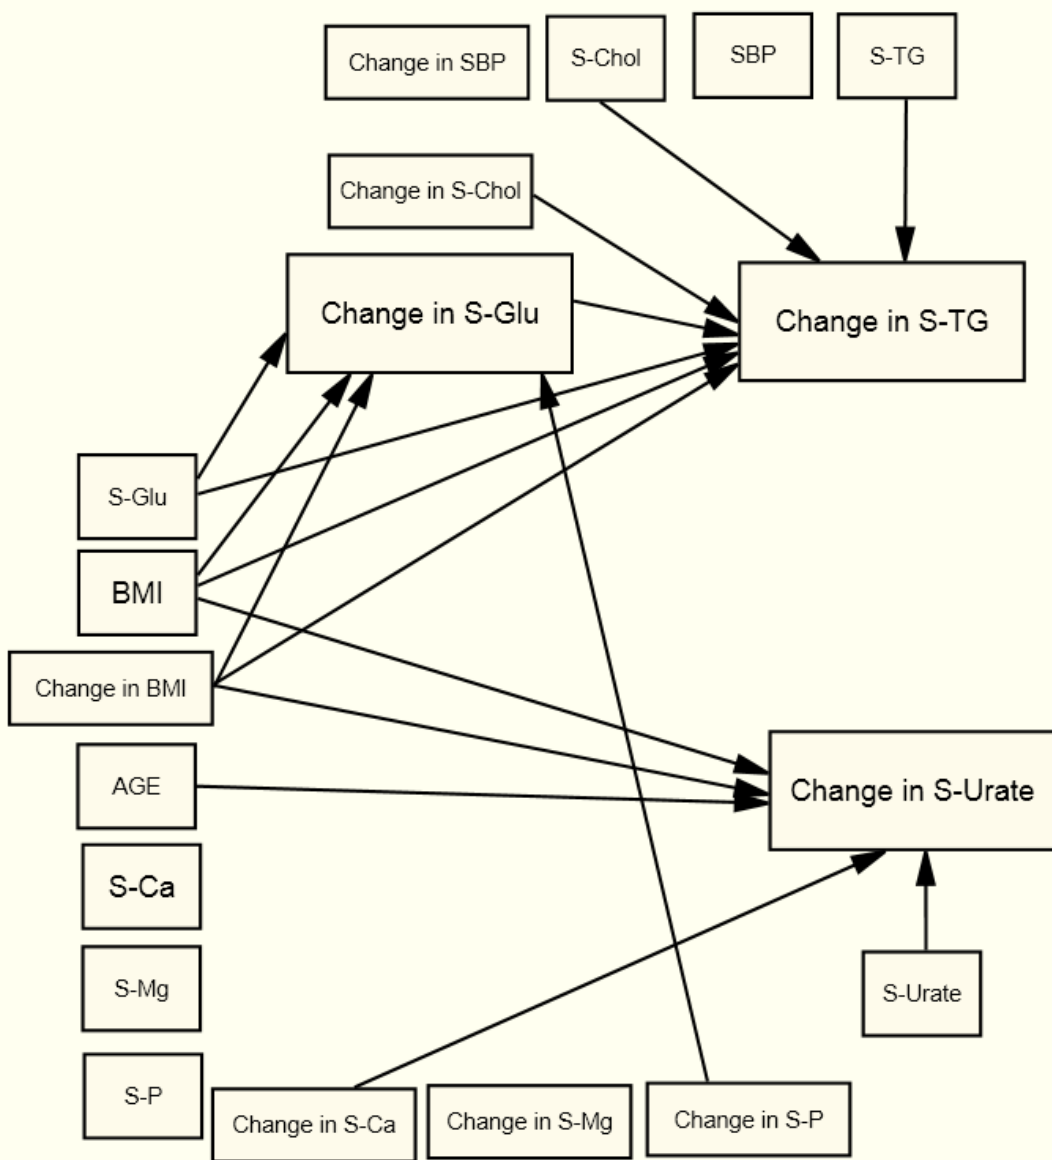

Supplement: MOESM4 [file 9538146]
